# Supplementary material
Source: ML conference proceedings conference paper supplement (https://openreview.net/forum?id=BGe6r8i9x5)

$\text{---} \text{+} \text{---} \text{ } \mathbf{b_i - c_i}$        $\text{---} \text{+} \text{---} \text{ } \boldsymbol{\beta_i}$        $\text{---} \text{+} \text{---} \text{ } \boldsymbol{\eta_i}$

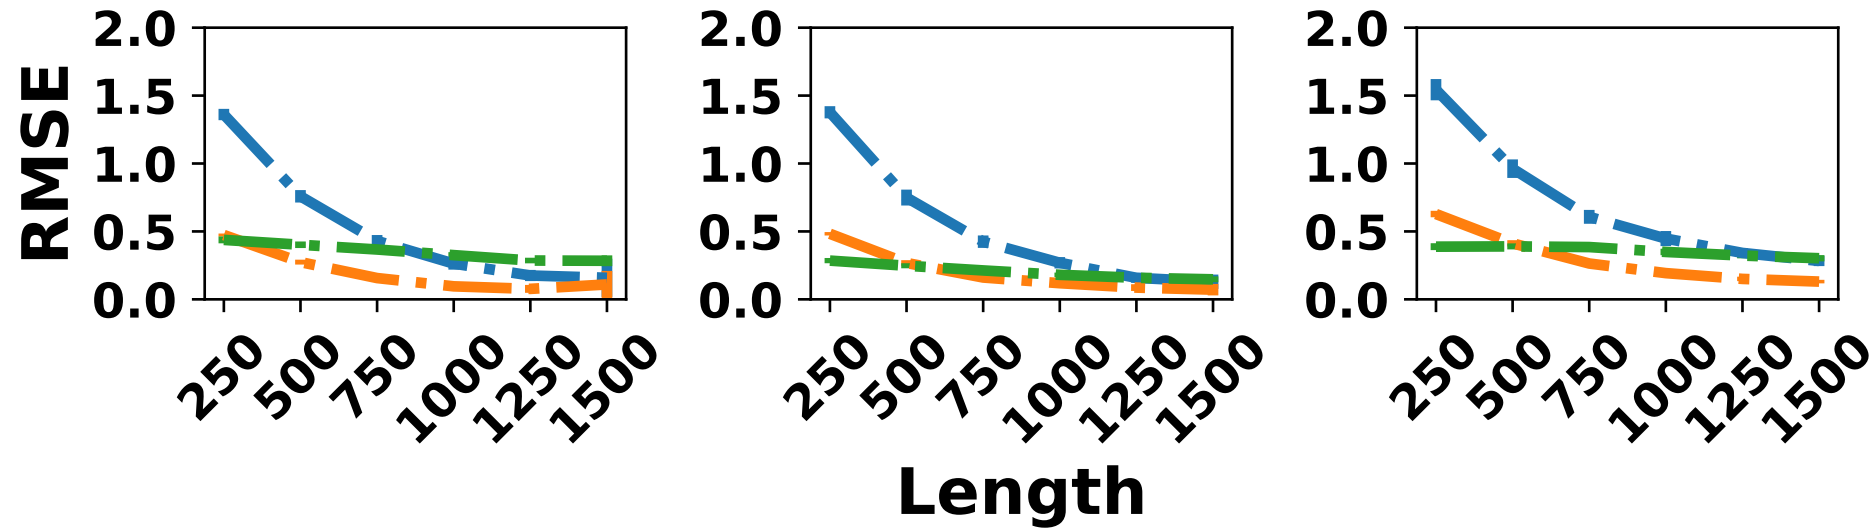

Supplement: supplementary_material [file attachment]
