# Supplementary material
Source: ML conference proceedings conference paper supplement (https://openreview.net/forum?id=BGe6r8i9x5)

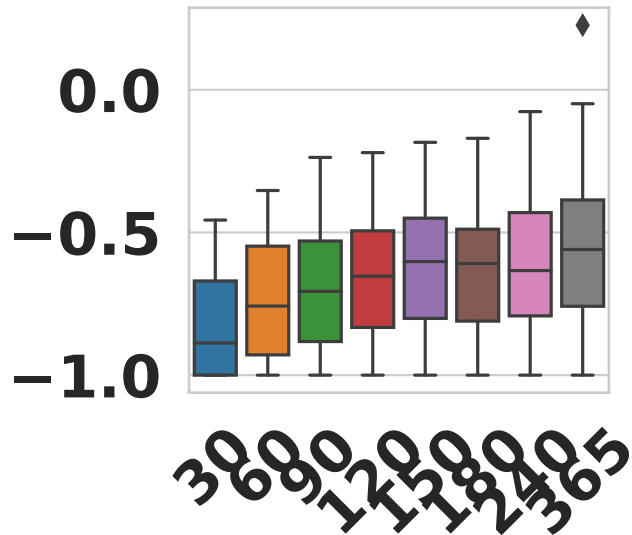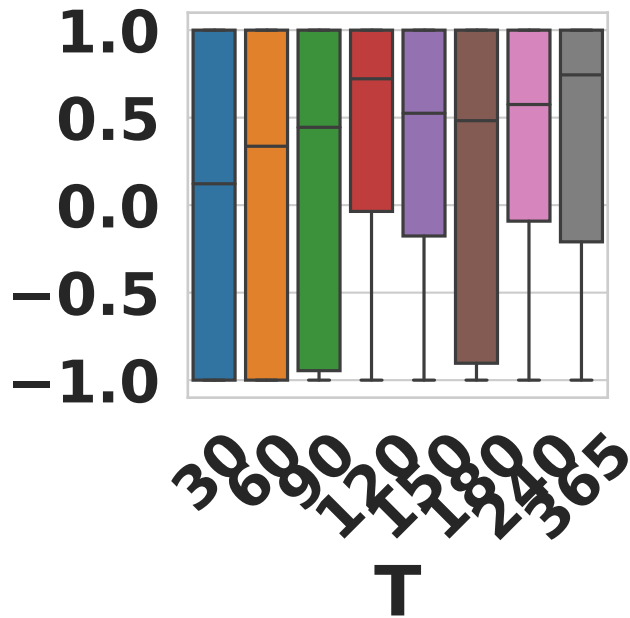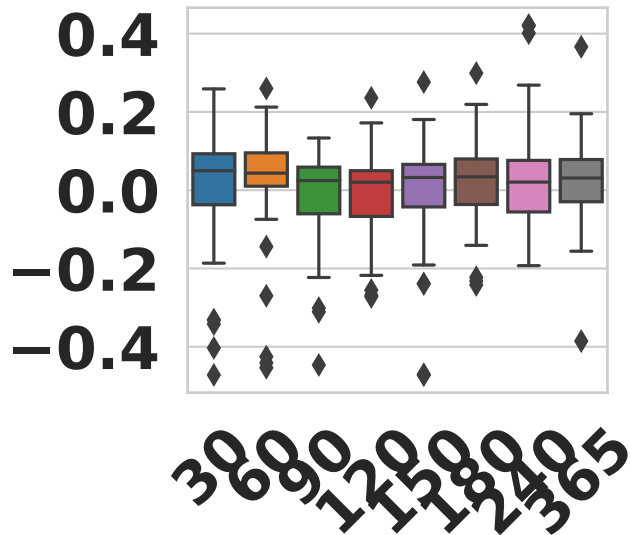

Supplement: supplementary_material [file attachment]

**log-likelihood**

**Markov** **Hawkes** **LIG**  
**Poisson** **b-MSGN**

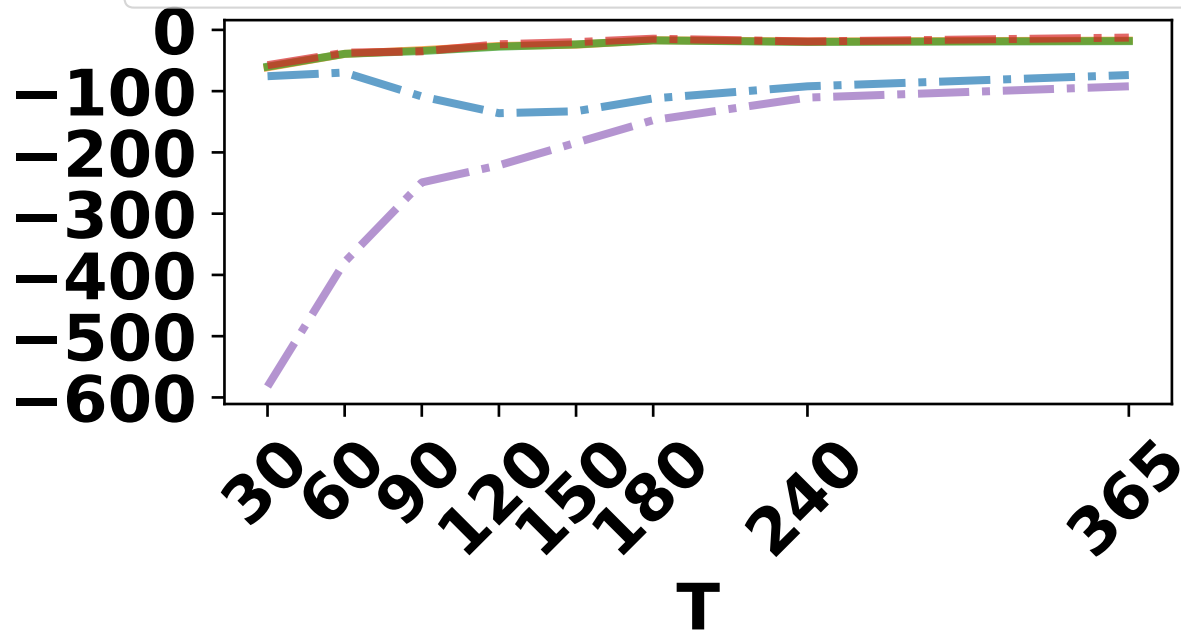

Supplement: supplementary_material [file attachment]

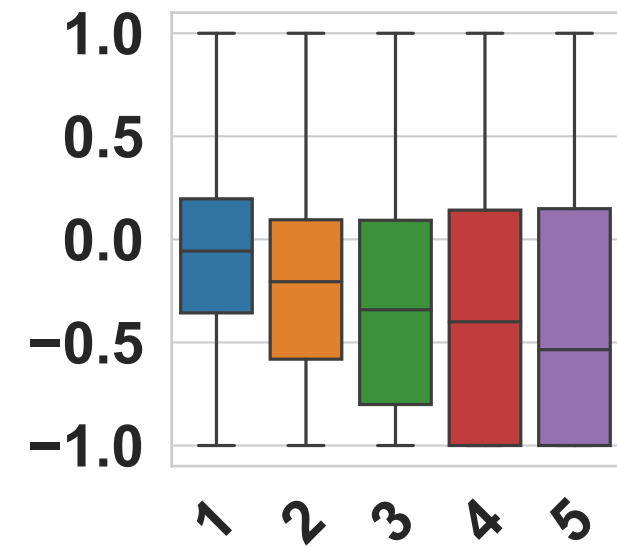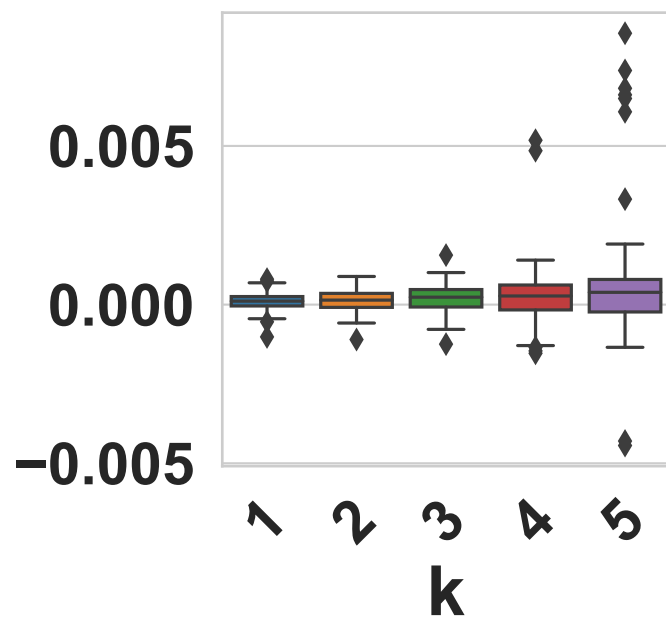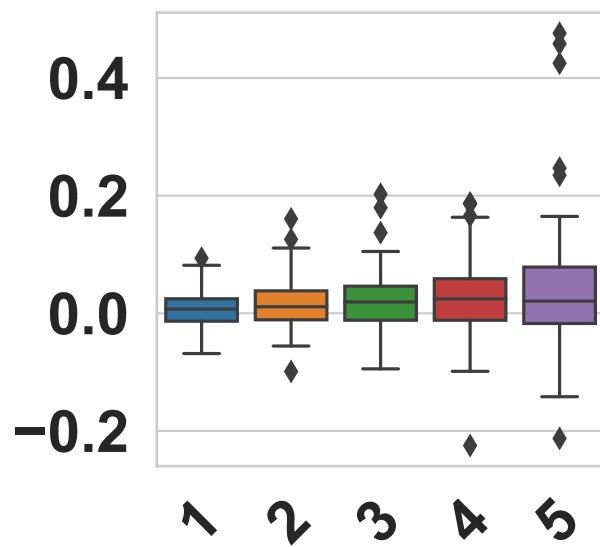

Supplement: supplementary_material [file attachment]

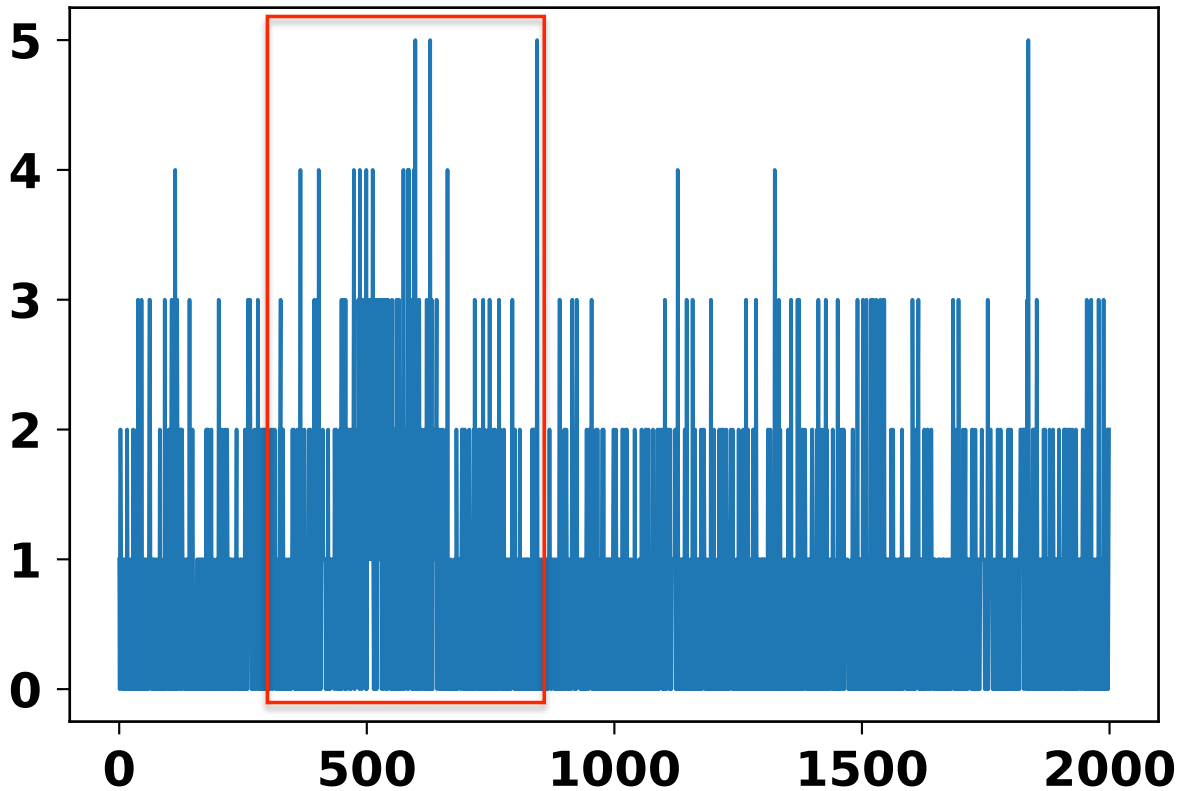

Supplement: supplementary_material [file attachment]

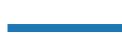**BA**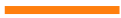**BTER**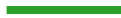**SW****TNR**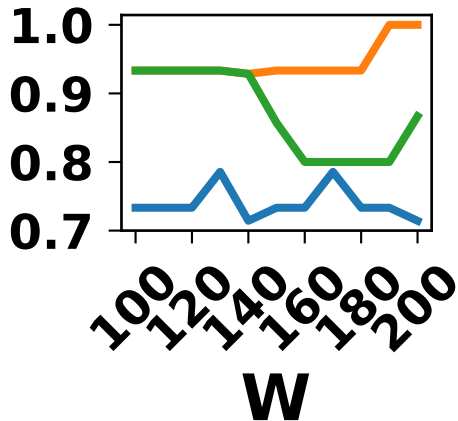**TPR**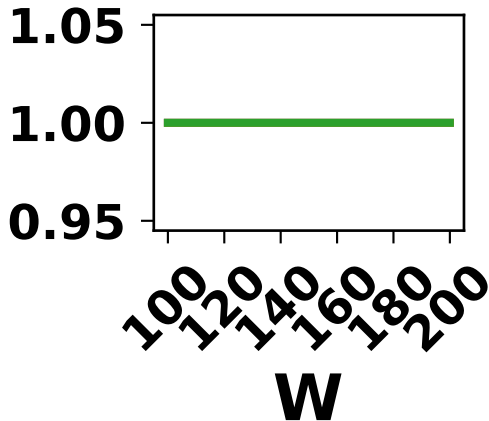

Supplement: supplementary_material [file attachment]

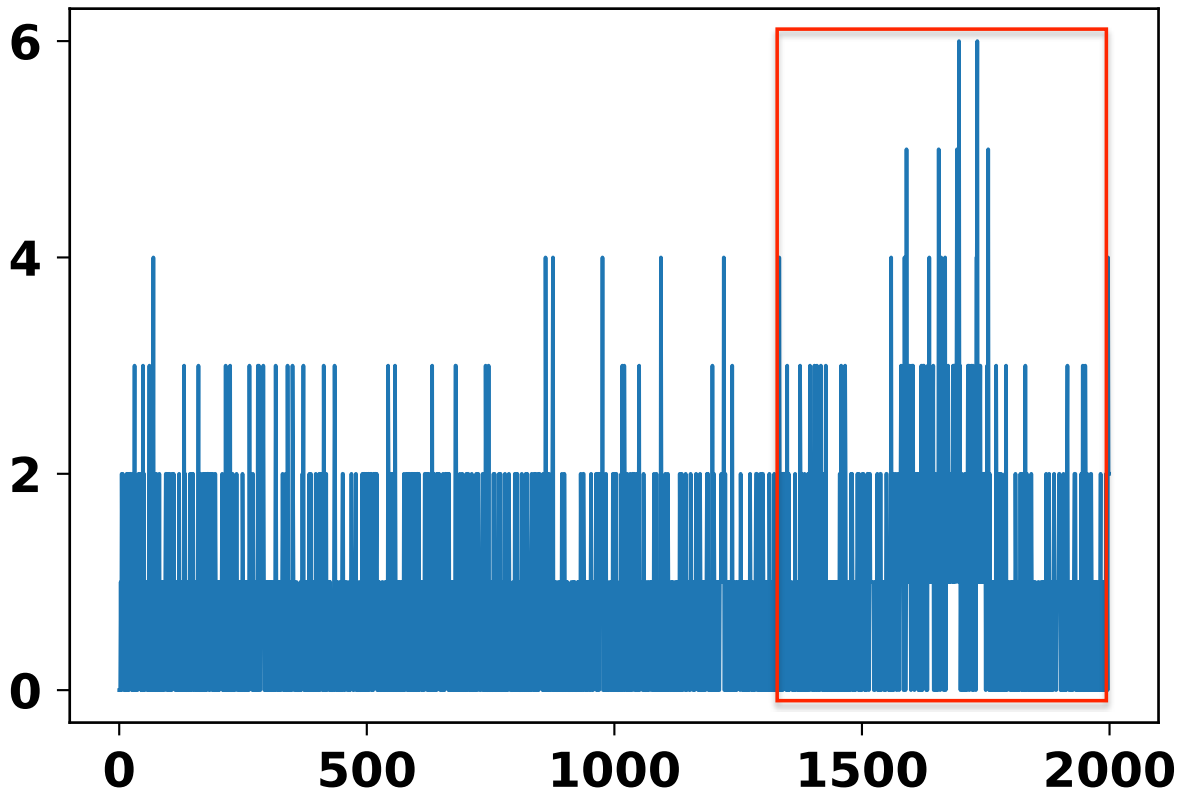

Supplement: supplementary_material [file attachment]

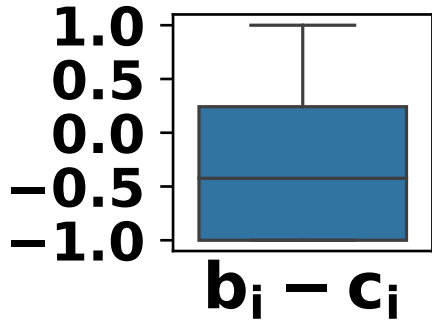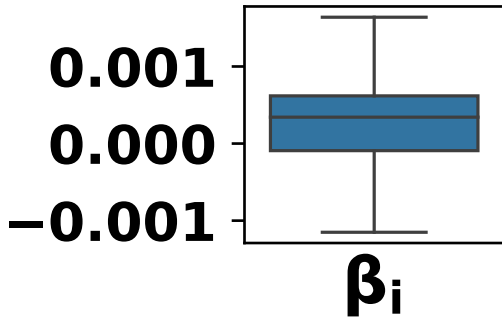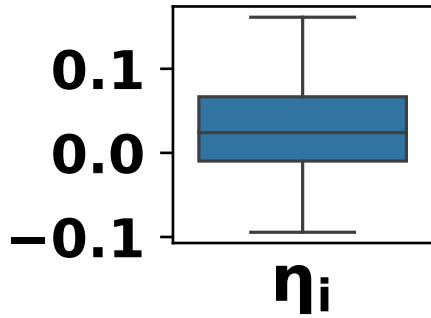

Supplement: supplementary_material [file attachment]

**p-value**

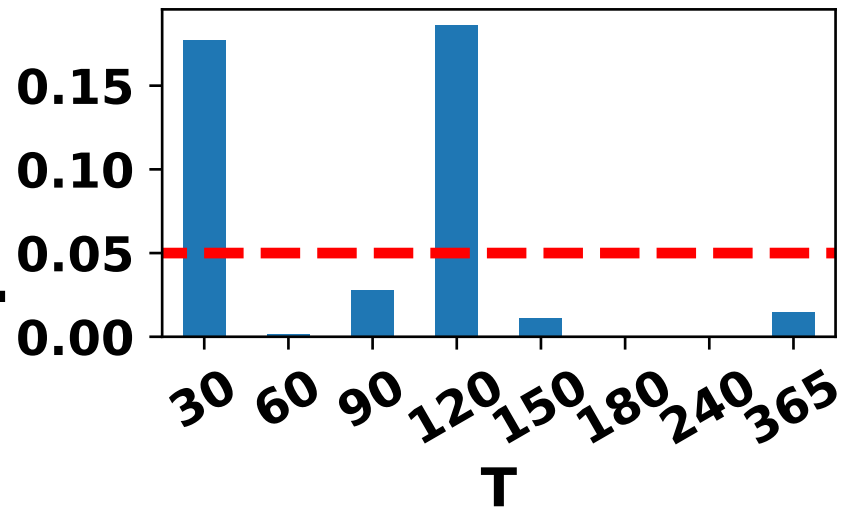

**log-likelihood**

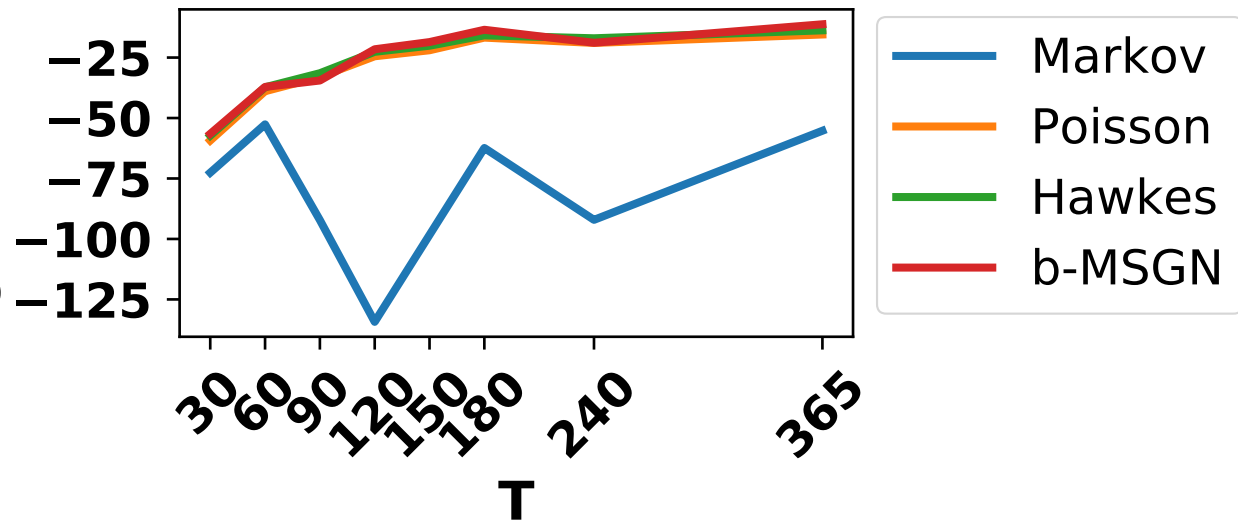

Supplement: supplementary_material [file attachment]

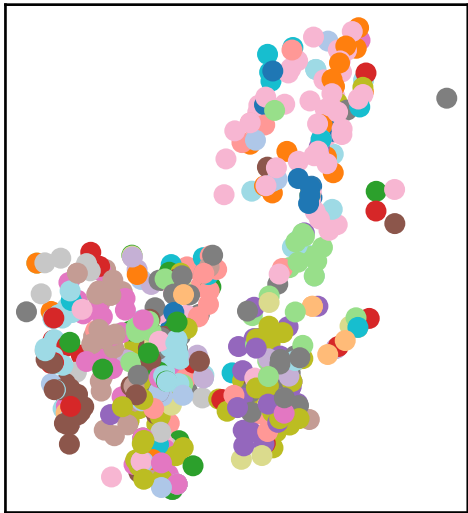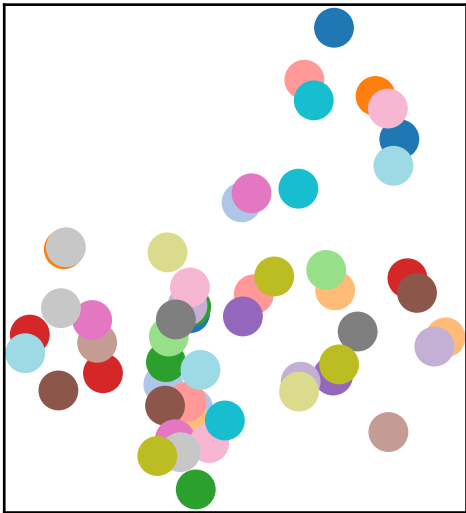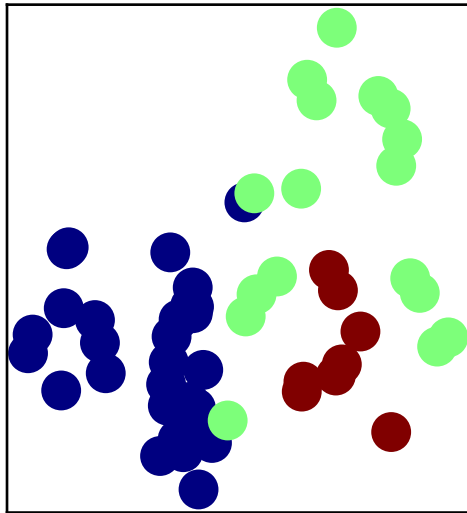

Supplement: supplementary_material [file attachment]

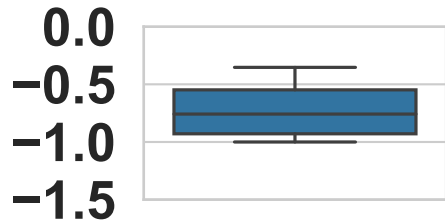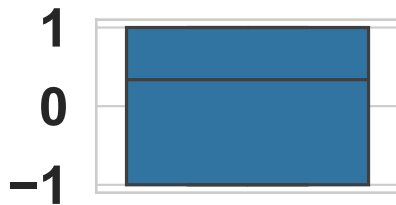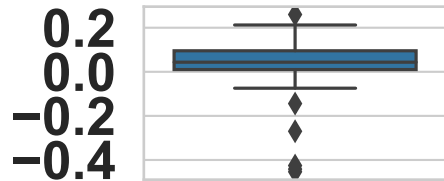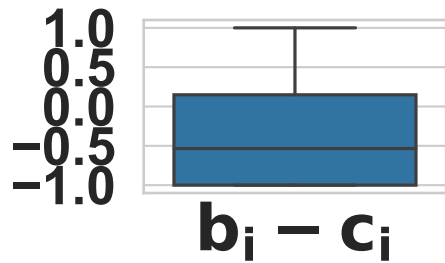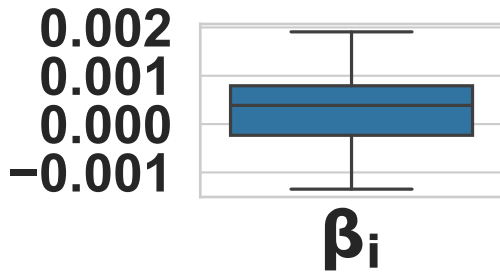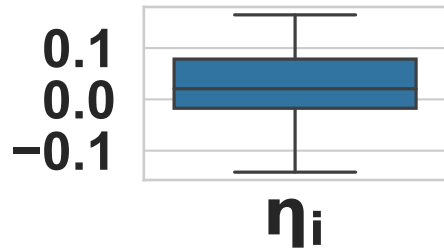

Supplement: supplementary_material [file attachment]

p-value

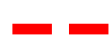

0.05

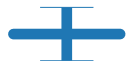

with groups

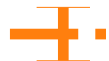

without group

1.0  
0.8  
0.6  
0.4  
0.2  
0.0

250 500 750 1000 1250 1500 2000

1.0  
0.8  
0.6  
0.4  
0.2  
0.0

250 500 750 1000 1250 1500 2000

Length

1.0  
0.8  
0.6  
0.4  
0.2  
0.0

250 500 750 1000 1250 1500 2000

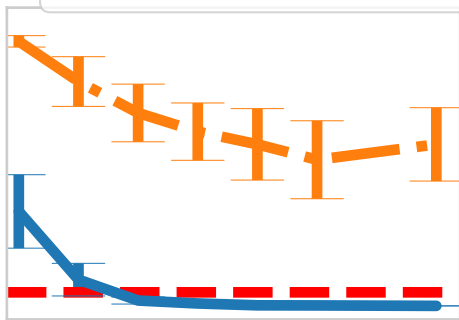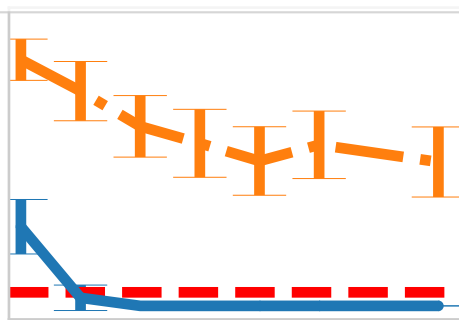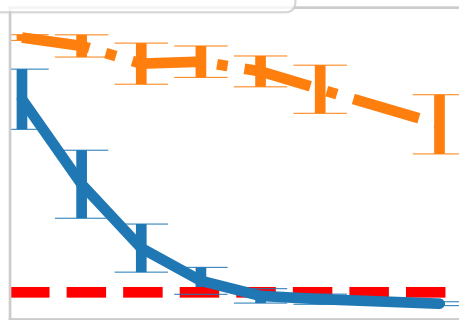

Supplement: supplementary_material [file attachment]

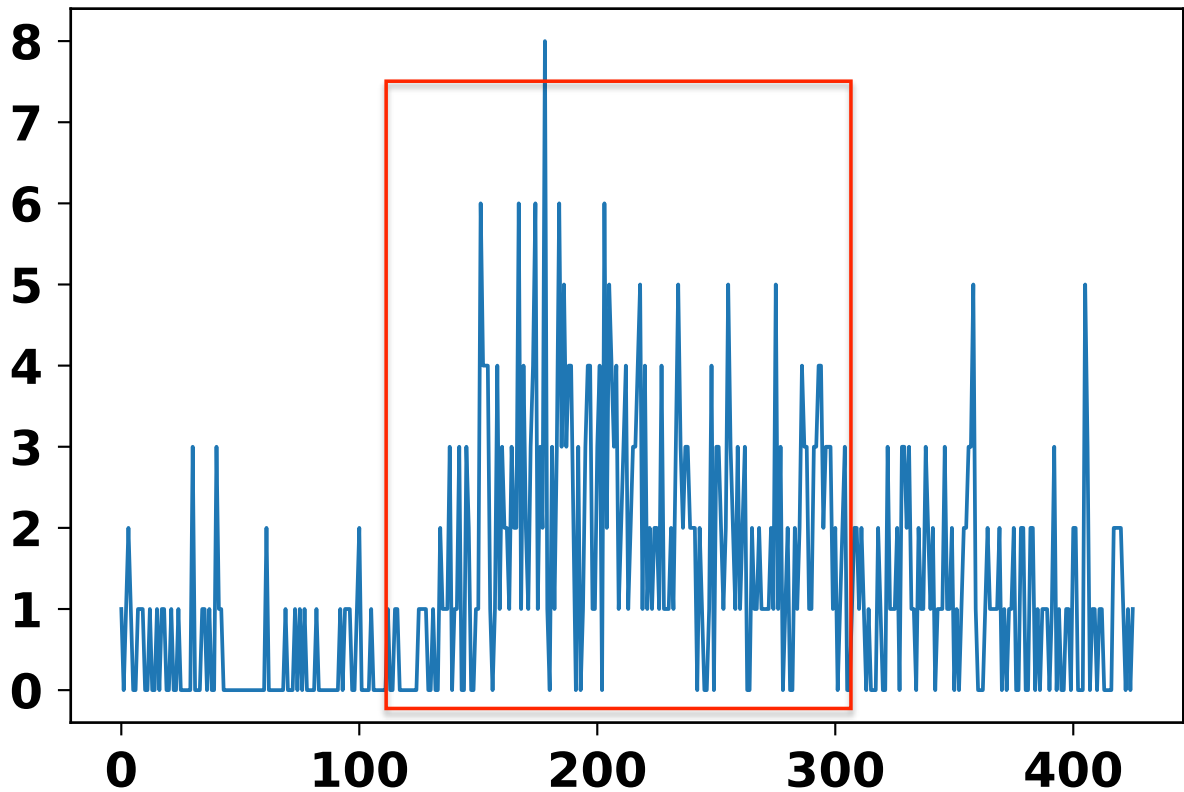

Supplement: supplementary_material [file attachment]

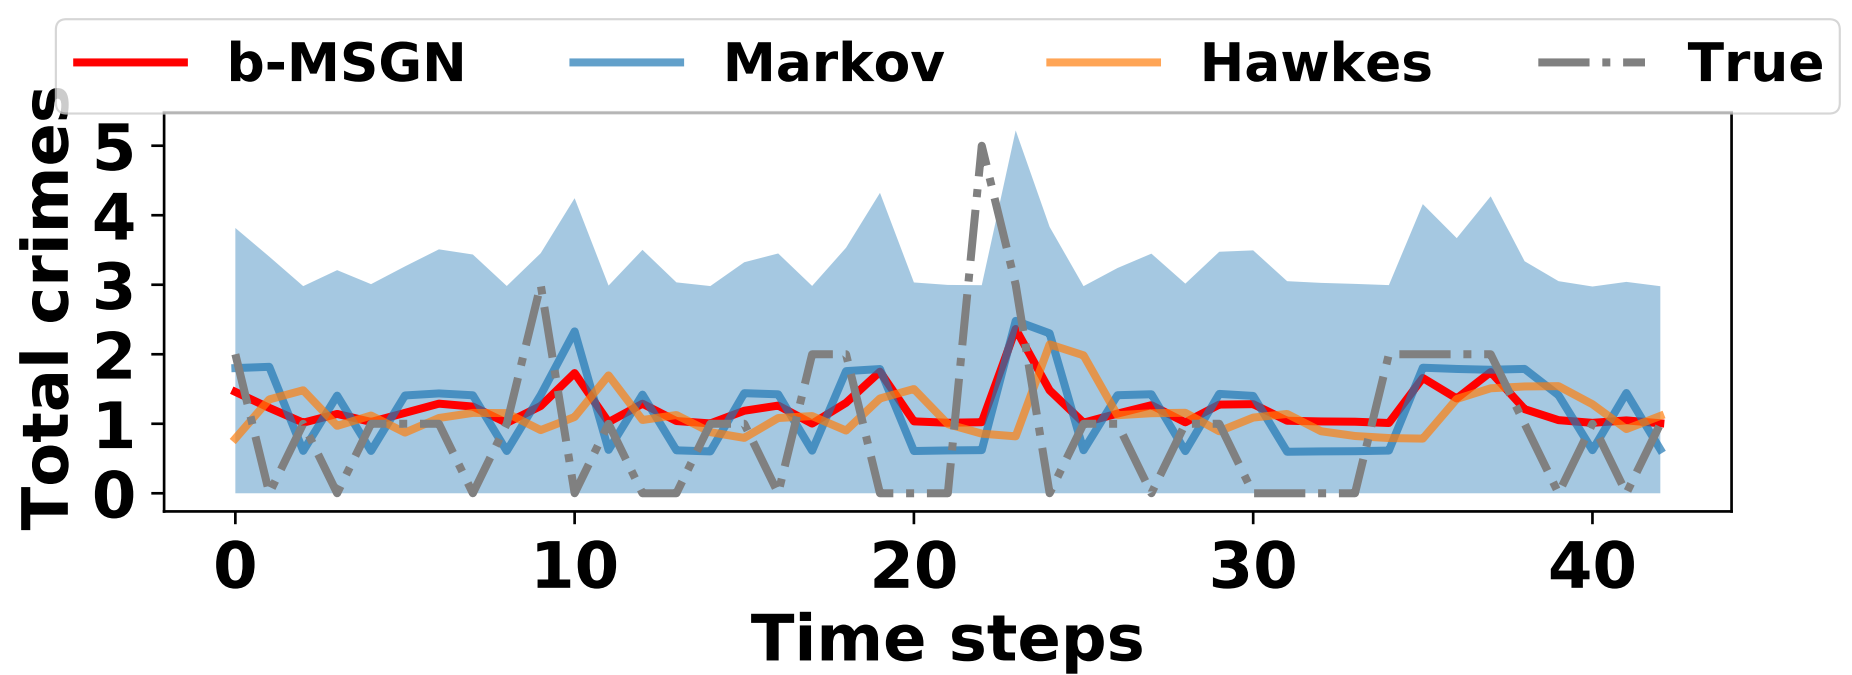

Supplement: supplementary_material [file attachment]

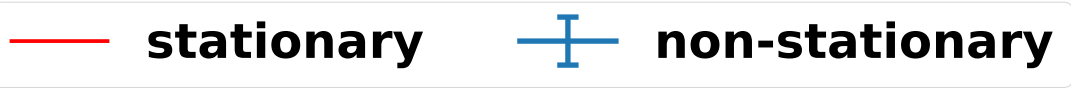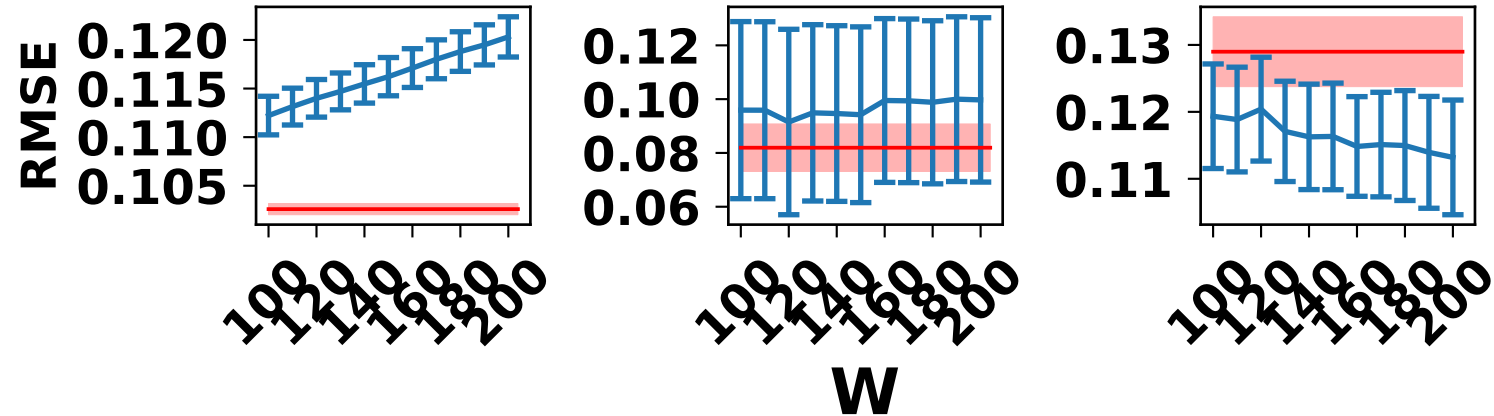

Supplement: supplementary_material [file attachment]

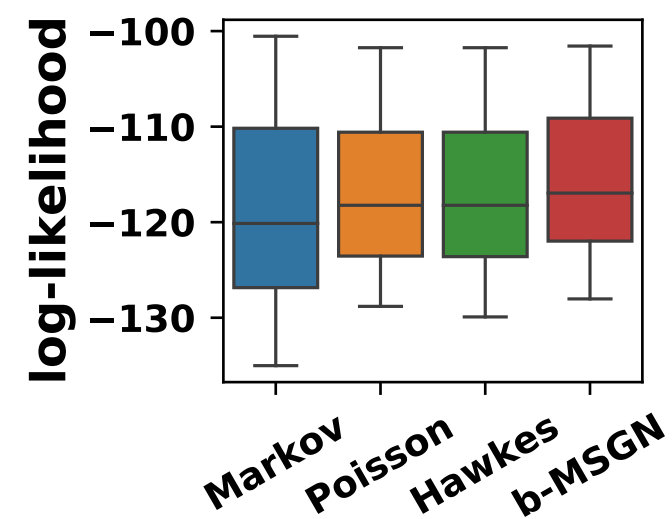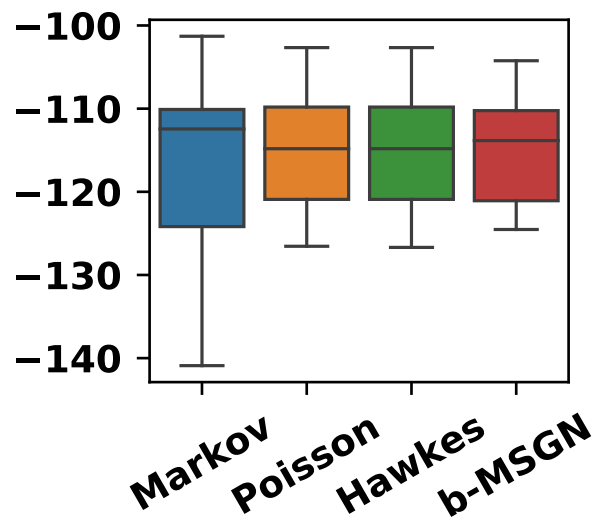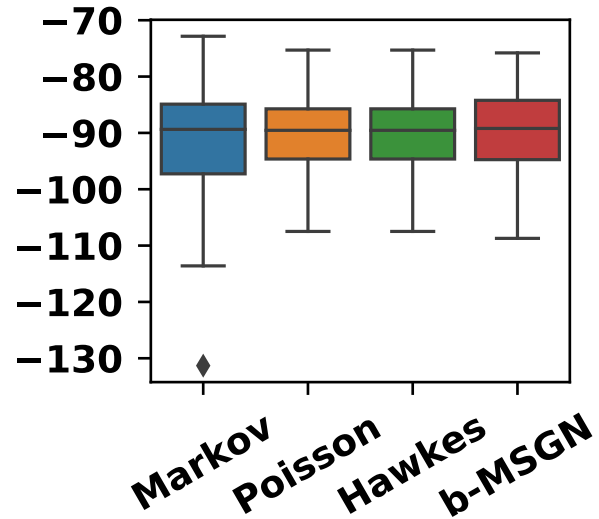

Supplement: supplementary_material [file attachment]

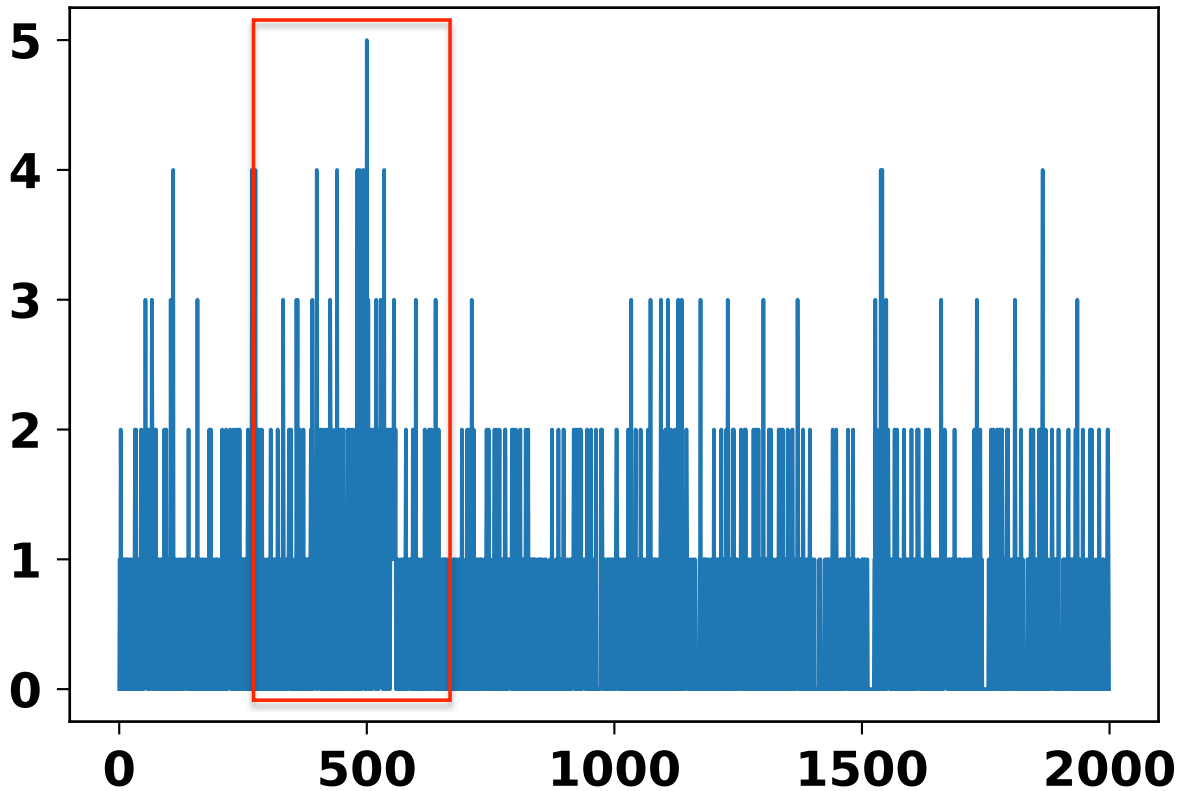

Supplement: supplementary_material [file attachment]

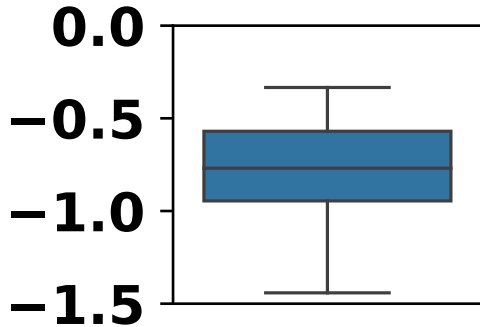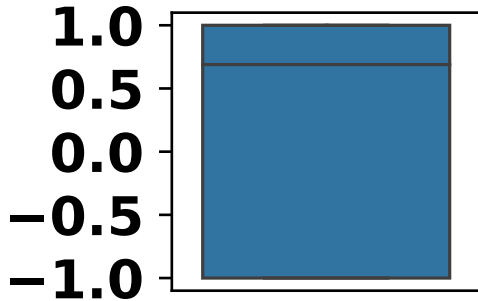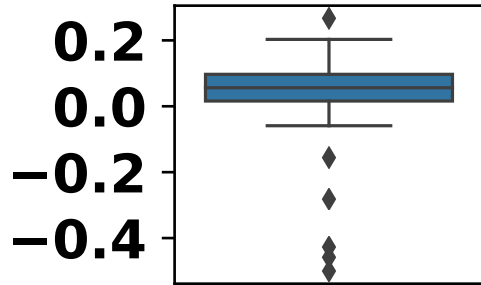

Supplement: supplementary_material [file attachment]
